# Supplementary material
Source: PubMed Central journal article supplement (PMC3048317)
Supplement: jc.2010-1935_1.pdf [file jc.2010-1935_1.pdf]

1

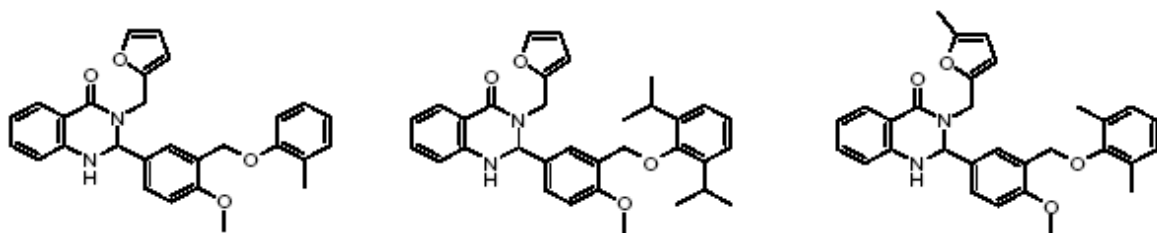

2

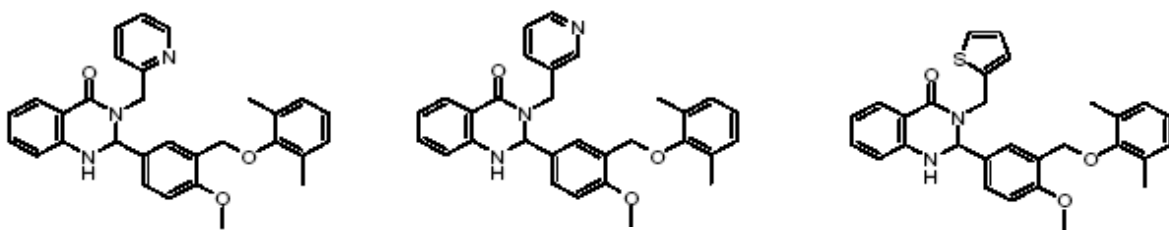

3

4 **Supplemental Figure 1.** Structures of the six analogs of NCGC00161856 (5) that were tested.

5  
6  
7  
8  
9  
10  
11  
12  
13  
14  
15  
16  
17  
18  
19  
20  
21  
22

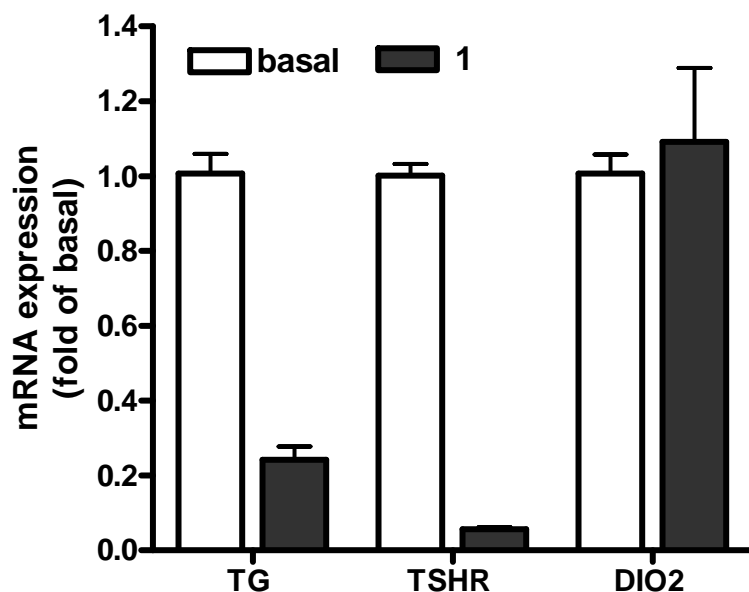

**Supplemental Figure 2.** Inhibition of basal (control) expression of thyroglobulin (TG), TSHR and deiodinase type 2 (DIO2) mRNAs by **1** in primary cultures of human thyrocytes.

Thyrocytes were incubated in DMEM containing 2% fetal bovine serum without (basal) or with 30  $\mu$ M **1** at 37 C. After 48 hr, the buffers were aspirated, the cells were lysed and the levels of TG, TSHR and DIO2 mRNAs were measured and normalized to GAPDH mRNA. The mRNA levels are presented as fold of basal levels. The data from 3 independent experiments with duplicate samples are shown.
